# Supplementary material for: Ketogenic-Mimicking Diet as a Therapeutic Modality for Bipolar Disorder: Biomechanistic Rationale and Protocol for a Pilot Clinical Trial
Source: MDPI journal article supplement (doi:10.3390/nu15133068), 2023-07-07
Supplement: s1 [file s1]

## **Supplementary Materials**

### *Section 1. Sample size calculation*

Sample size calculation was based on findings published by Mujica-Parodi et al. [1], which presented the first evidence for stabilizing effects of ketosis on resting state functional connectivity networks. Public dataset [2] and code ([https://github.com/bbantal/PAGB\\_network\\_instability](https://github.com/bbantal/PAGB_network_instability)) was used for calculation of network instability across a sample of 12 participants from that study. Default mode network (DMN) was chosen for calculating instabilities due to its profound energetic demand [3], extensive association with the symptomology of bipolar disorder [4], and its intrinsic predominance during the task-free resting state conditions under which our participants will be scanned. The following set of DMN instabilities was obtained for both standard diet and 1-week ketogenic diet conditions for each of the 12 participants, with  $\tau$  time constant set at 1 and time windows of 24 seconds, as in the original study [1]. See Supplementary Table S1 and Figure S1:

**Supplementary Table S1.** Computed default mode network (DMN) instabilities by condition

| <b>Participant</b> | <b>DMN Instability</b> | <b>Condition</b> |
|--------------------|------------------------|------------------|
| sub001             | 0.6831335              | Standard Diet    |
| sub002             | 0.5992506              | Standard Diet    |
| sub005             | 0.6130102              | Standard Diet    |
| sub019             | 0.6237661              | Standard Diet    |
| sub022             | 0.4820238              | Standard Diet    |
| sub027             | 0.5731876              | Standard Diet    |
| sub028             | 0.4069916              | Standard Diet    |
| sub031             | 0.6780192              | Standard Diet    |
| sub032             | 0.4900810              | Standard Diet    |
| sub034             | 0.6041005              | Standard Diet    |
| sub036             | 0.5906136              | Standard Diet    |
| sub038             | 0.5027476              | Standard Diet    |
| sub001             | 0.3998186              | Ketogenic Diet   |
| sub002             | 0.5014335              | Ketogenic Diet   |
| sub005             | 0.4027200              | Ketogenic Diet   |
| sub019             | 0.4504665              | Ketogenic Diet   |
| sub022             | 0.3769252              | Ketogenic Diet   |
| sub027             | 0.4965531              | Ketogenic Diet   |
| sub028             | 0.5006693              | Ketogenic Diet   |
| sub031             | 0.7310587              | Ketogenic Diet   |
| sub032             | 0.4335100              | Ketogenic Diet   |
| sub034             | 0.4655478              | Ketogenic Diet   |
| sub036             | 0.5401029              | Ketogenic Diet   |
| sub038             | 0.5742642              | Ketogenic Diet   |

**Supplementary Figure S1.** Boxplot of participant DMN instabilities by condition

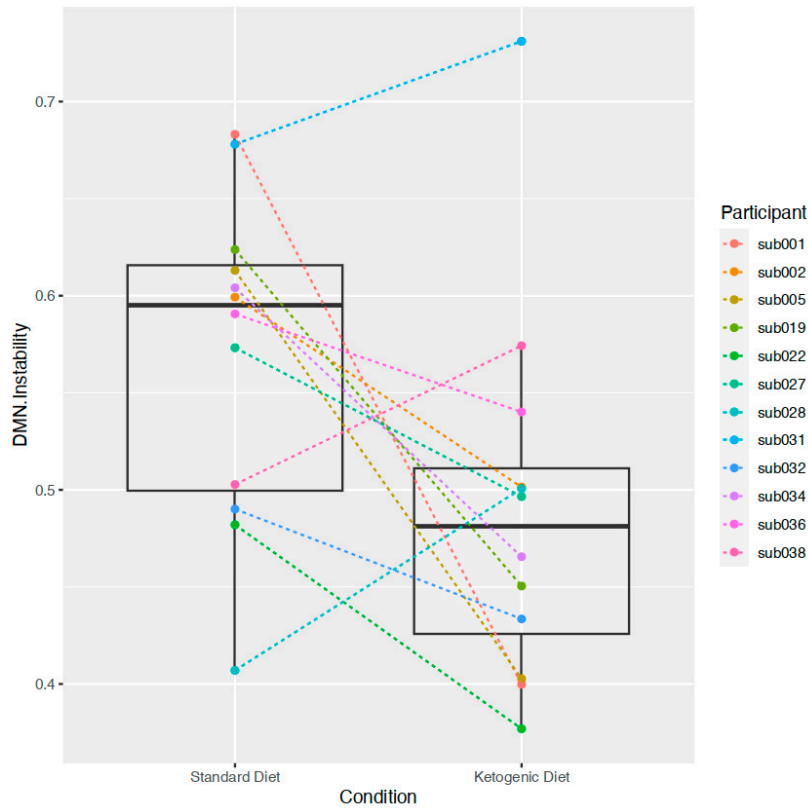

Mean difference ( $M_{diff}$ ) was divided by the pooled standard deviation ( $S_p$ ) of DMN instabilities between the two conditions to estimate Cohen's  $d$  effect size:

$$M_{diff} = M_{ket} - M_{std}$$

$$S_p = \sqrt{\frac{(S_{ket}^2 + S_{std}^2)}{2}}$$

$$d = \frac{M_{diff}}{S_p}$$

The resulting Cohen's  $d$  estimate was calculated to be -0.90, generally considered a strong effect. Lastly, R programming language package *pwr* (<https://github.com/heliosdrm/pwr>) was used to estimate paired samples  $t$ -test sample size at a significance level of 0.05, power of 0.8, and computed effect size estimate of -0.90. The resulting estimated minimal sample size was computed at 12 participants. However, this sample size is based on strict ketogenic diet intervention data, which might yield a greater effect on DMN instability than our proposed ketogenic-mimicking diet. Assuming that the effect of a ketogenic-mimicking diet is moderate as compared to the strong effect of a strict ketogenic diet, we reduced our expected effect size to -0.5, which yielded an estimated sample size of 34 participants.

## **References**

- [1] L. R. Mujica-Parodi *et al.*, "Diet modulates brain network stability, a biomarker for brain aging, in young adults," *Proc. Natl. Acad. Sci.*, vol. 117, no. 11, pp. 6170–6177, Mar. 2020, doi: 10.1073/pnas.1913042117.
- [2] L. R. Mujica-Parodi *et al.*, "Protecting the Aging Brain - Diet-Study." Openneuro, 2021. doi: 10.18112/OPENNEURO.DS003437.V1.0.2.
- [3] M. E. Raichle and A. Z. Snyder, "A default mode of brain function: A brief history of an evolving idea," *NeuroImage*, vol. 37, no. 4, pp. 1083–1090, Oct. 2007, doi: 10.1016/j.neuroimage.2007.02.041.
- [4] B. Bi, D. Che, and Y. Bai, "Neural network of bipolar disorder: Toward integration of neuroimaging and neurocircuit-based treatment strategies," *Transl. Psychiatry*, vol. 12, no. 1, p. 143, Apr. 2022, doi: 10.1038/s41398-022-01917-x.
